# Supplementary material for: The Impact of Prebiotic, Probiotic, and Synbiotic Supplements and Yogurt Consumption on the Risk of Colorectal Neoplasia among Adults: A Systematic Review
Source: MDPI journal article supplement (doi:10.3390/nu14224937), 2022-11-21
Supplement: s1 [file s1]

## Supplementary Material 1- Search Terms

### Search Terms

**PubMed – Search performed 30 April, 692 results // Search performed May 12, 833 results**

Core Search:

((((((((((((((("Colorectal Neoplasms"[Mesh]) OR "Colorectal Neoplasms"[Majr]) OR "Colonic Neoplasms"[Mesh:NoExp]) OR "Colonic Neoplasms"[Majr:NoExp]) OR "Sigmoid Neoplasms"[Mesh:NoExp]) OR "Sigmoid Neoplasms"[Majr:NoExp]) OR "Adenomatous Polyposis Coli"[Mesh:NoExp]) OR "Adenomatous Polyposis Coli"[Majr:NoExp]) OR "Gardner Syndrome"[Mesh:NoExp]) OR "Gardner Syndrome"[Majr:NoExp]) OR "Intestinal Polyps"[Mesh:NoExp]) OR "Intestinal Polyps"[Majr:NoExp]) OR "Colonic Polyps"[Mesh:NoExp]) OR "Colonic Polyps"[Majr:NoExp]) OR "Colorectal Neoplasms, Hereditary Nonpolyposis"[Mesh:NoExp]) OR "Colorectal Neoplasms, Hereditary Nonpolyposis"[Majr:NoExp]) OR "Rectal Neoplasms"[Mesh:NoExp]) OR "Rectal Neoplasms"[Majr:NoExp]) OR ("colorectal neoplas\*" [tw] OR "epithelial poly\*" [tw] OR "adenomatous poly\*" [tw] OR "polyposis col\* adenomatous" [tw] OR "polyposis syndrome" [tw] OR "hereditary polypos\*, familial" [tw] OR "myh-associated polypos\*" [tw] OR "sessile serrated poly\*" [tw] OR "colorectal cance\*" [tw] OR "recurrent colorectal cance\*" [tw] OR "colorectal cancer progression free survival" [tw] OR "colon\* cance\*" [tw] OR "cancer of the colon" [tw] OR "overall colorectal cancer survival" [tw] OR "colorectal tumo\*" [tw] OR "carcinoma\* colorectal" [tw] OR "colonic neoplas\*" [tw] OR "colon\* poly\*" [tw] OR "rectal neoplas\*" [tw] OR "gardner\* syndrom\*" [tw] OR "intestinal poly\*" [tw] OR "sigmoid neoplas\*" [tw] OR "sigmoid cance\*" [tw]))

**AND**

("Probiotics"[MeSH Terms:noexp] OR "Probiotics"[MeSH Major Topic:noexp] OR "Lactobacilli"[Text Word] OR "bifidobacterial"[Text Word]) OR ("Prebiotics"[MeSH Terms:noexp] OR "Prebiotics"[MeSH Major Topic:noexp] OR "Inulin"[Text Word] OR "Fructooligosaccharides"[Text Word] OR "FOS"[Text Word] OR "galactooligosaccharides"[Text Word] OR "GtOS"[Text Word] OR "xylooligosaccharides"[Text Word] OR "XOS"[Text Word] OR "isomaltooligosaccharides"[Text Word] OR "IMO"[Text Word] OR "beta-glucans"[Text Word] OR

"polyphenols"[Text Word] OR "lactulose"[Text Word])) OR ("microbiome"[Text Word] OR "microbiota"[Text Word]) OR ("yogurt"[Text Word])

# **AND**

("randomized controlled trial"[Publication Type] OR "controlled clinical trial"[Publication Type] OR "randomized"[Title/Abstract] OR "placebo"[Title/Abstract] OR "drug therapy"[MeSH Subheading] OR "randomly"[Title/Abstract] OR "observational"[Title/Abstract] OR "cohort"[Title/Abstract] OR "case control\*"[Title/Abstract] OR "cross-sectional"[Title/Abstract] OR "cross-sectional"[Title/Abstract] OR "trial"[Title/Abstract] OR "groups"[Title/Abstract]) NOT ("animals"[MeSH Terms] NOT "humans"[MeSH Terms])

**Embase – Search performed 30 April, 1200 results // Search performed 12 May, 1204 results**

|           |                                                                                                                                                                                                                                                                                                                                                                                                                                                                                                                                                                                                                                                                                                                                                                                                                                                                                                                                                                                                                                       |
|-----------|---------------------------------------------------------------------------------------------------------------------------------------------------------------------------------------------------------------------------------------------------------------------------------------------------------------------------------------------------------------------------------------------------------------------------------------------------------------------------------------------------------------------------------------------------------------------------------------------------------------------------------------------------------------------------------------------------------------------------------------------------------------------------------------------------------------------------------------------------------------------------------------------------------------------------------------------------------------------------------------------------------------------------------------|
| <b>#1</b> | ('colorectal neoplas*','ab,ti OR 'epithelial poly*','ab,ti OR 'adenomatous poly*','ab,ti OR 'polyposis col*','ab,ti OR 'adenomatous','ab,ti OR 'polyposis syndrome','ab,ti OR 'hereditary polypos*','ab,ti OR 'familial','ab,ti OR 'myh-associated polypos*','ab,ti OR 'sessile serrated poly*','ab,ti OR 'colorectal cance*','ab,ti OR 'recurrent colorectal cance*','ab,ti OR 'colorectal cancer progression free survival','ab,ti OR 'colon* cance*','ab,ti OR 'cancer of the colon','ab,ti OR 'overall colorectal cancer survival','ab,ti OR 'colorectal tumo*','ab,ti OR 'carcinoma* colorectal','ab,ti OR 'colonic neoplas*','ab,ti OR 'colon* poly*','ab,ti OR 'rectal neoplas*','ab,ti OR 'gardner* syndrom*','ab,ti OR 'intestinal poly*','ab,ti OR 'sigmoid neoplas*','ab,ti OR 'sigmoid cance*':ab,ti OR 'colorectal tumor'/mj OR 'colorectal adenoma'/exp/mj OR 'colon tumor'/mj OR 'colon adenoma'/mj OR 'colon polyp'/mj OR 'colon polyposis'/mj OR 'gardner syndrome'/mj OR 'intestine polyp'/mj OR 'rectum tumor'/mj) |
| <b>#2</b> | ('inulin','ab,ti OR 'fructose oligosaccharide','ab,ti OR 'fructooligosaccharides','ab,ti OR 'fos','ab,ti OR 'galactose oligosaccharide':ab,ti OR 'galactooligosaccharides':ab,ti OR 'gtos':ab,ti OR 'xylooligosaccharides':ab,ti OR 'xos':ab,ti OR 'isomaltooligosaccharide':ab,ti OR 'polyphenol':ab,ti OR 'lactulose':ab,ti OR 'β-glucans':ab,ti OR 'prebiotic agent'/mj OR 'lactobacillus':ab,ti OR 'bifidobacteriales':ab,ti OR 'probiotic agent'/mj OR 'yogurt')                                                                                                                                                                                                                                                                                                                                                                                                                                                                                                                                                                 |

|           |                                                                                                                                                                                                                                                                                                                                                                                                   |
|-----------|---------------------------------------------------------------------------------------------------------------------------------------------------------------------------------------------------------------------------------------------------------------------------------------------------------------------------------------------------------------------------------------------------|
| <b>#3</b> | ('case control study'/de OR 'clinical study'/de OR 'clinical trial'/de OR 'clinical trial topic'/de OR 'comparative study'/de OR 'controlled clinical trial'/de OR 'controlled study'/de OR 'human'/de OR 'intervention study'/de OR 'observational study'/de OR 'practice guideline'/de OR 'prospective study'/de OR 'randomized controlled trial'/de OR 'randomized controlled trial topic'/de) |
| <b>#4</b> | 'human'/de                                                                                                                                                                                                                                                                                                                                                                                        |
| <b>#5</b> | #1 AND #2 AND #3 AND #4                                                                                                                                                                                                                                                                                                                                                                           |

**Web of Science – search completed 30 April 2021, 1188 results // 12 May, 1236 results**

- Indexes=SCI-EXPANDED, SSCI, A&HCI, CPCI-S, CPCI-SSH, BKCI-S, BKCI-SSH, ESCI, CCR-EXPANDED
- Document Types: Article

|           |                                                                                                                                                                                                                                                                                                                                                                                                                                                                                                                                                                                                                                                       |
|-----------|-------------------------------------------------------------------------------------------------------------------------------------------------------------------------------------------------------------------------------------------------------------------------------------------------------------------------------------------------------------------------------------------------------------------------------------------------------------------------------------------------------------------------------------------------------------------------------------------------------------------------------------------------------|
| <b>#1</b> | (TS=("Inulin" OR "Fructooligosaccharides" OR "FOS" OR "galactooligosaccharides" OR "GtOS" OR "xylooligosaccharides" OR "XOS" OR "isomaltooligosaccharides" OR "IMO" OR "β-glucans" OR "polyphenols" OR "lactulose" OR "prebiotic*" OR "prebiotic interventions"))                                                                                                                                                                                                                                                                                                                                                                                     |
| <b>#2</b> | (TS=("Lactobacilli" OR "bifidobacterial" OR "probiotic*" OR "yogurt"))                                                                                                                                                                                                                                                                                                                                                                                                                                                                                                                                                                                |
| <b>#3</b> | (TS=("synbiotic*"))                                                                                                                                                                                                                                                                                                                                                                                                                                                                                                                                                                                                                                   |
| <b>#4</b> | (TS=("colorectal neoplas*" OR "epithelial poly*" OR "adenomatous poly*" OR "polyposis col*", adenomatous" OR "polyposis syndrome" OR "hereditary polypos* familial" OR "myh-associated polypos*" OR "sessile serrated poly*" OR "colorectal cance*" OR "recurrent colorectal cance*" OR "colorectal cancer progression free survival" OR "colon* cance*" OR "cancer of the colon" OR "overall colorectal cancer survival" OR "colorectal tumo*" OR "carcinoma* colorectal" OR "colonic neoplas*" OR "colon* poly*" OR "rectal neoplas*" OR "gardner* syndrom*" OR "intestinal poly*" OR "sigmoid neoplas*" OR "sigmoid cance*" OR "rectal neoplas*")) |
| <b>#5</b> | (TS= ((randomized controlled trial OR controlled clinical trial OR randomized OR placebo OR randomly OR observational OR cohort OR "case-control" OR "case control" OR "cross-sectional" OR "cross sectional" OR trial OR groups OR human*) NOT (animals NOT humans)))                                                                                                                                                                                                                                                                                                                                                                                |

|           |                |
|-----------|----------------|
| <b>#6</b> | #1 or #2 or #3 |
| <b>#7</b> | #4 and #6      |
| <b>#8</b> | #7 and #5      |

# **Cochrane Reviews & Trials – Search performed 30 April 2021**

**1 review, 62 trials //12 May search - 1 review, 62 trials**

|            |                                                                                                                                                                                                                                                                                                                                                                                                                                                                                                                                                                                                                                                                   |
|------------|-------------------------------------------------------------------------------------------------------------------------------------------------------------------------------------------------------------------------------------------------------------------------------------------------------------------------------------------------------------------------------------------------------------------------------------------------------------------------------------------------------------------------------------------------------------------------------------------------------------------------------------------------------------------|
| <b>#1</b>  | ("colorectal neoplas*" OR "epithelial poly*" OR "adenomatous poly*" OR "polyposis col*", adenomatous" OR "polyposis syndrome" OR "hereditary polypos* familial" OR "myh-associated polypos*" OR "sessile serrated poly*" OR "colorectal cance*" OR "recurrent colorectal cance*" OR "colorectal cancer progression free survival" OR "colon* cance*" OR "cancer of the colon" OR "overall colorectal cancer survival" OR "colorectal tumo*" OR "carcinoma* colorectal" OR "colonic neoplas*" OR "colon* poly*" OR "rectal neoplas*" OR "gardner* syndrom*" OR "intestinal poly*" OR "sigmoid neoplas*" OR "sigmoid cance*" OR "rectal neoplas*" OR "colo-rectal") |
| <b>#2</b>  | MeSH descriptor: [Colorectal Neoplasms] this term only                                                                                                                                                                                                                                                                                                                                                                                                                                                                                                                                                                                                            |
| <b>#3</b>  | MeSH descriptor: [Sigmoid Neoplasms] this term only                                                                                                                                                                                                                                                                                                                                                                                                                                                                                                                                                                                                               |
| <b>#4</b>  | MeSH descriptor: [Adenomatous Polyposis Coli] this term only                                                                                                                                                                                                                                                                                                                                                                                                                                                                                                                                                                                                      |
| <b>#5</b>  | MeSH descriptor: [Gardner Syndrome] this term only                                                                                                                                                                                                                                                                                                                                                                                                                                                                                                                                                                                                                |
| <b>#6</b>  | MeSH descriptor: [Intestinal Polyps] this term only                                                                                                                                                                                                                                                                                                                                                                                                                                                                                                                                                                                                               |
| <b>#7</b>  | MeSH descriptor: [Colonic Polyps] this term only                                                                                                                                                                                                                                                                                                                                                                                                                                                                                                                                                                                                                  |
| <b>#8</b>  | MeSH descriptor: [Colorectal Neoplasms, Hereditary Nonpolyposis] this term only                                                                                                                                                                                                                                                                                                                                                                                                                                                                                                                                                                                   |
| <b>#9</b>  | MeSH descriptor: [Rectal Neoplasms] this term only                                                                                                                                                                                                                                                                                                                                                                                                                                                                                                                                                                                                                |
| <b>#10</b> | ("Inulin" OR "Fructooligosaccharides" OR "FOS" OR "galactooligosaccharides" OR "GtOS" OR "xylooligosaccharides" OR "XOS" OR "isomaltooligosaccharides" OR "IMO" OR "β-glucans" OR "polyphenols" OR "lactulose" OR "prebiotic*" OR "prebiotic interventions") OR ("Lactobacilli" OR "bifidobacterial" OR "probiotic*") OR ("synbiotic*") OR ("yogurt"),                                                                                                                                                                                                                                                                                                            |

|            |                                                    |
|------------|----------------------------------------------------|
| <b>#11</b> | MeSH descriptor: [Probiotics] this term only       |
| <b>#12</b> | MeSH descriptor: [Prebiotics] this term only       |
| <b>#13</b> | #1 or #2 or #3 or #4 or #5 or #6 or #7 or #8 or #9 |
| <b>#14</b> | #10 or #11 or #12                                  |
| <b>#15</b> | #13 and #14                                        |

### Clinical Trials

("colorectal neoplas\*" OR "epithelial poly\*" OR "adenomatous poly\*" OR "polyposis col\*, adenomatous" OR "polyposis syndrome" OR "hereditary polypos\* familial" OR "myh-associated polypos\*" OR "sessile serrated poly\*" OR "colorectal cance\*")
